# Supplementary material
Source: MDPI journal article supplement (https://www.mdpi.com/2813-4168/2/1/1)
Supplement: s1 [file s1]

# **Questionnaire survey to assess the impact of pollution on Health Status of Traffic Police, Kolkata**

Date

Place

## **A. Demography**

- Male/ Female:
- Age: Under 20/ 21-30/ 31-40/ 41-50/ 51-60/ Above 60
- Marital Status: Single/ Married/ Unmarried/ Widow/ Widower/ Divorced/ Separated
- Smoking: Yes/ No
- Regular Sporting Activities: Yes/ No
- Education: Up to Class IV/ Class V-X/ Class XI-XII/ Graduate/ Postgraduate/ Professional
- Working Life (years):
- Duty Hours:

## **B. Lifestyle and habits**

- Tobacco use: Yes/ No; If yes, Smoking/ Chewing; Cig/ Beedi per day.....; Years of smoking .....
- Alcohol use: Yes/ No; if yes, Regular/ Occasional
- Are you a diabetic? No/ Yes; If yes, do you take: Oral medicines/ Insulin/ Both

### C. Health related symptoms

| Sl. No. | Physical Health Status                                                           | Mental Health Status                       |
|---------|----------------------------------------------------------------------------------|--------------------------------------------|
| 1.      | High blood pressure: No/ Yes                                                     | Difficulty in concentration: No/ Yes       |
| 2.      | Throat Irritation or Sore Throat: No/ Yes; If yes, Occasional/ Frequent          | Physical and psychological Stress: No/ Yes |
| 3.      | Running nose: No/ Yes                                                            | Frequent Irritation: No/ Yes               |
| 4.      | Sinusitis: No/ Yes                                                               | Sleeplessness: No/ Yes                     |
| 5.      | Sneezing: No/ Yes; If yes, Occasional/ Frequent                                  | Nervousness: No/ Yes                       |
| 6.      | Nasal congestion: No/ Yes; If yes, Occasional/ Frequent                          | Feeling of loneliness: No/ Yes             |
| 7.      | Eye irritation/ itching: No/ Yes; If yes, Occasional/ Frequent                   | Fatigue/drowsiness: No/ Yes                |
| 8.      | Cough: No/ Yes; If yes, Occasional/ Frequent                                     |                                            |
| 9.      | Chest discomfort/ tightening: No/ Yes                                            |                                            |
| 10.     | Breathlessness: No/ Yes                                                          |                                            |
| 11.     | Medically diagnosed Asthma: No/ Yes; If yes, taking inhaler/ medication? No/ Yes |                                            |
| 12.     | Skin irritation/ itching? No/ Yes; If yes, Occasional/ Frequent                  |                                            |
| 13.     | Roughness of Skin/ Dry Skin: No/ Yes                                             |                                            |
| 14.     | Lung problems: No/ Yes                                                           |                                            |
| 15.     | Bronchitis: No/ Yes                                                              |                                            |
| 16.     | Visibility problem: No/ Yes                                                      |                                            |
| 17.     | Hearing problem? No/ Yes                                                         |                                            |
| 18.     | Spinal cord/ back problem: No/ Yes                                               |                                            |

**Comments**
